# Supplementary material
Source: PubMed Central journal article supplement (PMC1895232)

## peripheral blood T cells

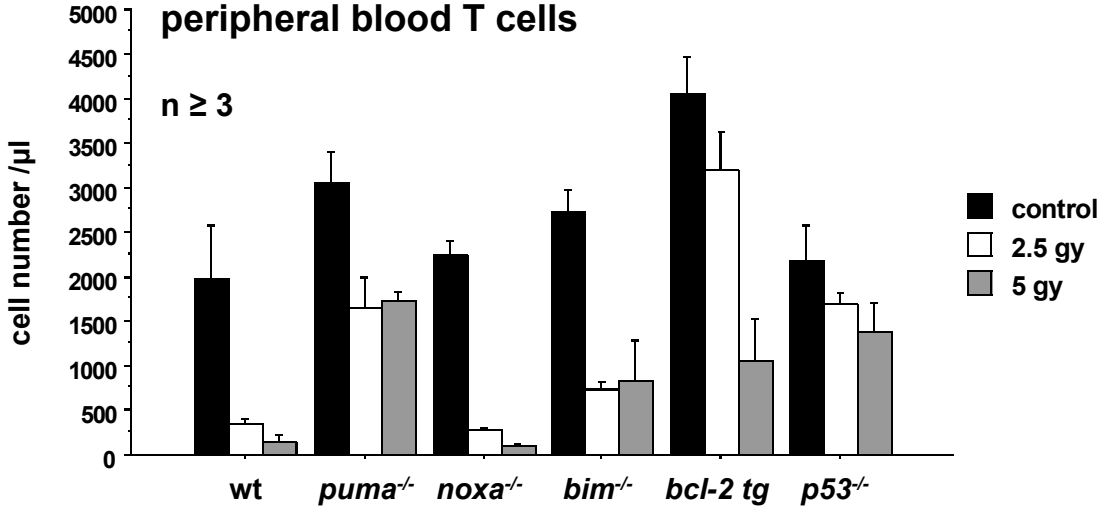

## peripheral blood B cells

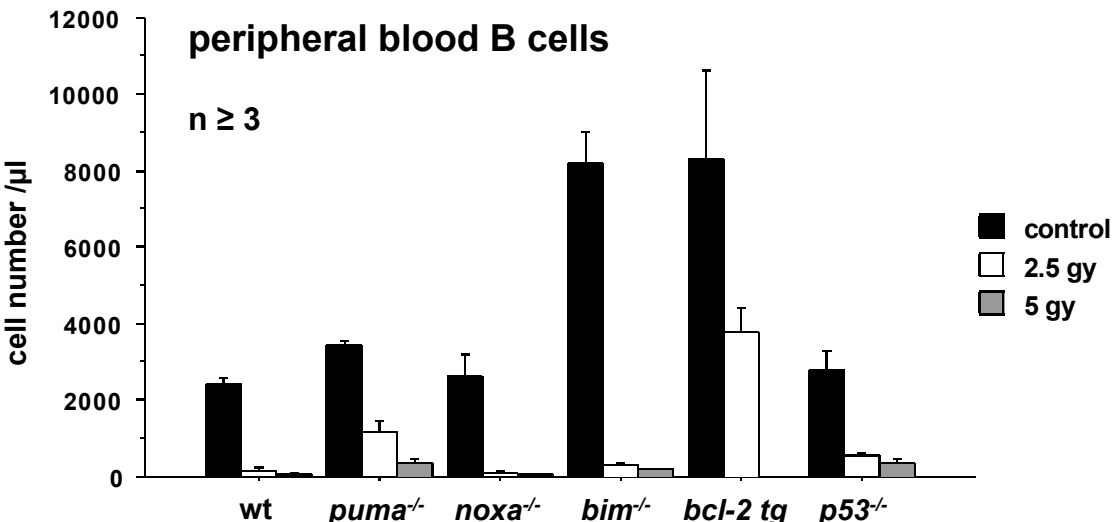

Supplement: blood_2005-04-1595_1.pdf [file blood_2005-04-1595_1.pdf]

# CD4-8<sup>-</sup> DN thymocytes

n ≥ 3

total cellularity [x10<sup>7</sup>]

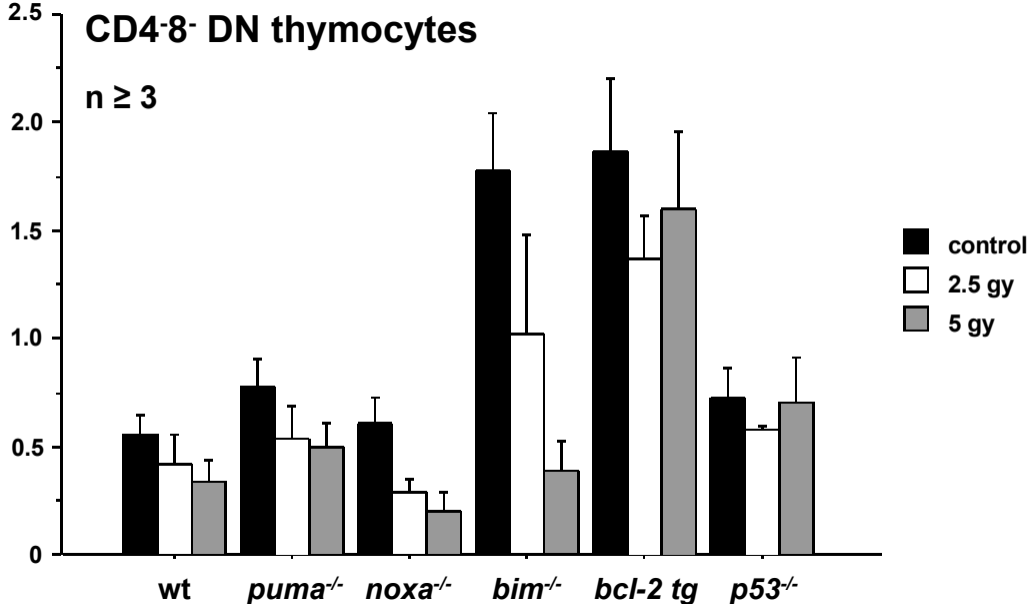

Supplement: blood_2005-04-1595_2.pdf [file blood_2005-04-1595_2.pdf]
